## SAFE-clustering: Single-cell Aggregated (From Ensemble) Clustering for Single-cell RNA-seq Data

Yuchen Yang<sup>1</sup>, Ruth Huh<sup>2</sup>, Houston W. Culpepper<sup>1</sup>, Michael I. Love<sup>1,2</sup>, Yun Li<sup>1,2\*</sup>

1. Department of Genetics, 2. Department of Biostatistics, University of North Carolina at Chapel Hill, Chapel Hill, NC 27599, USA

We present SAFE-clustering, a flexible and efficient cluster ensemble method for single-cell RNA-seq (scRNA-seq) data. Taking as input results from multiple clustering methods, SAFE-clustering generates more accurate and robust consensus clustering results. Assessment across 14 datasets with the number of clusters ranging from 3 to 14, and the number of single cells ranging from 49 to >32,000 showcases the advantages of SAFE-clustering (<http://yunliweb.its.unc.edu/safe/>) both computationally and in terms of performance.

RNA sequencing (RNA-seq) has been widely used to study gene regulatory networks underlying the complex processes of cellular proliferation, differentiation and reprogramming<sup>1-4</sup>. However, for most genes, their expression levels are found to vary dramatically across cell types and in different individual cells<sup>5-7</sup>. Therefore, bulk RNA-seq, measuring the average expression across many cells of different cell types, may mask the real functional capacities of each cell type<sup>2</sup>. Comparatively, single-cell RNA sequencing (scRNA-seq) enables researchers to investigate the cellular heterogeneity in gene expression profiles, as well as to determine cell types and predict cell fates, thus presenting enormous potential for cell biology and clinical applications<sup>1,3,8-12</sup>.

Single-cell clustering provides intuitive identification and characterization of cell types from a mass of heterogeneous cells, which can itself be of interest<sup>13</sup>, and can be used as covariates in downstream differential expression analysis<sup>14</sup>. However, the high dimensionality of scRNA-seq data pose a grand challenge for unsupervised cell clustering<sup>15-17</sup>. One convenient method for single-cell clustering is *k*-means clustering on dimensional reduced data, where high dimensional data are first reduced into a lower dimensional subspace by principal component analysis (PCA) or t-Distributed Stochastic Neighbor Embedding algorithm (t-SNE)<sup>18</sup> and then the lower-dimensional data are clustered with *k*-means<sup>12,19</sup>. Because of the importance of clustering for scRNA-seq data, recently, several algorithms have been developed, including Seurat<sup>20</sup>, CIDR<sup>16</sup>, DIMM-SC<sup>14</sup>, SIMLR<sup>17</sup> and SC3<sup>21</sup>. However, none of the clustering algorithms is an apparent all-time winner across all datasets<sup>22</sup>. Discrepancies across methods occur both in the estimated number of clusters and in actual single-cell-level cluster assignment. These discrepancies are mainly due to the use of different characteristics of scRNA-seq data by different methods. Individual clustering methods may fail to reveal the true clustering behind a heterogeneous mass (of single cells in this case) when assumptions underlying the methods are violated. Therefore, it is highly challenging, if not impossible, to choose an optimal algorithm for clustering scRNA-seq data when no prior knowledge on cell types and/or cell type specific expression signatures are given.

In the absence of one single optimal clustering method, cluster ensemble provides an elegant solution by combining results from multiple individual methods into one consensus result<sup>23,24</sup>. Compared to individual solutions, ensemble methods exhibit two major advantages. First, ensemble improves clustering quality and robustness, as demonstrated in other contexts including analysis of cell signaling dynamics and protein folding<sup>25,26</sup>. Second, ensemble methods enable model selection. For example, we and others<sup>16,21,22</sup> observe, in certain datasets, dramatically different estimates for the number of clusters across individual solutions. It is hard to decide on one single solution without any external knowledge or constraints. Cluster ensemble is able to estimate an optimal number of clusters by quantifying the shared information between the final consensus solution and individual solutions<sup>24</sup>. Although the

majority may not always be the most accurate in every case and for every cell, a consensus approach tends to outperform each individual method when the optimal method is not known in advance. However, to date, there is no published cluster ensemble approach across multiple types of clustering methods specifically designed for scRNA-seq data.

To bridge the gap, we have developed SAFE-clustering, Single-cell Aggregated (From Ensemble) clustering, to provide more stable, robust and accurate clustering for scRNA-seq data. In the current implementation, SAFE-clustering first performs independent clustering using four state-of-the-art methods, SC3, CIDR, Seurat and t-SNE +  $k$ -means, and then combines the four individual solutions into one consolidated solution using one of three hypergraph partitioning algorithms: hypergraph partitioning algorithm (HGPA), meta-clustering algorithm (MCLA) and cluster-based similarity partitioning algorithm (CSPA)<sup>23</sup>.

## Results

### Overview of SAFE-clustering

Our SAFE-clustering leverages hypergraph partitioning methods<sup>23</sup> to ensemble results from multiple individual clustering methods. The current SAFE-clustering implementation embeds four clustering methods: SC3, Seurat, t-SNE +  $k$ -means, and CIDR. Figure 1 shows the overview of our SAFE-clustering method.

### Benchmarking of SAFE-clustering across 14 datasets

We benchmarked SAFE-clustering together with its four embedded individual clustering methods on 14 published scRNA-seq datasets<sup>4,27-34</sup>, reflecting a wide spectrum of experimental technology, sequencing depth, tissue origin, number and heterogeneity of single cells examined (details are summarized in Table 1 and supplementary Table S1). Among the 14 datasets, we examine two large peripheral blood mononuclear cells (PBMC) mixture datasets with >28,000 single cells were constructed by mixing single-cell datasets of purified cell types generated by the 10× Genomics<sup>34</sup> as described in Sun et al<sup>14</sup>. Specifically, we created one dataset representing a “simple case” with 28,733 single cells from three distinct cell types: CD56+ natural killer cells, CD19+ B cells and CD4+/CD25+ regulatory T cells; and the other dataset representing a “challenging case” with 32,695 single cells from three highly similar cell types: CD8+/CD45RA+ naive cytotoxic T cells, CD4+/CD45RA+/CD25- naive T cells and CD4+/CD25+ regulatory T cells.

For the 14 datasets attempted, SAFE-clustering outperforms all the individual solutions in five datasets: Baron\_human1, Baron\_human3, Baron\_mouse1, and the two PBMC mixture datasets (Figure 2; Figure S1). Furthermore, SAFE-clustering performs better than at least two individual methods in six additional datasets (Biase, Yan, Darmanis, Zeisel, and Baron\_human2 and 4) (Figure 2; Figure S1). These results show that SAFE-clustering performs robustly well across various datasets. We also compared the estimated number of clusters and found that among individual methods, CIDR performs the best (Figure 3B); SC3 tends to overestimate the number of clusters (Figure 3A), while t-SNE +  $k$ -means tends to underestimate (Figure 3D). Our SAFE-clustering outperforms all individual solutions (Figure 3E and F), quantified by the average absolute deviation from the true/gold-standard cluster numbers ( $\bar{D} = \frac{1}{m} \sum_m |\hat{k} - k_t|$ , where  $m$  is the number of datasets (=14 in our work);  $\hat{k}$  is the estimated number of clusters; and  $k_t$  is the true (or predefined gold/silver standard) number of cell types).

For the simple case PBMC mixture dataset, both CIDR and SC3 yielded 3 clusters with Adjusted Rand Index (ARI)<sup>35</sup> of 0.827 and 0.995, respectively (Figure 2). Seurat assigned the single cells into 16 clusters with an ARI of 0.239. Also, Seurat failed to generate clustering results for three (out of 28,733) single cells because of <200 expressed genes in these cells. For t-SNE +  $k$ -means, we applied Rtsne<sup>18</sup> on the top 1,000 most variable genes to

save computing time and memory usage (Figure S2, identifying three clusters with an ARI of 0.976. Combining the four individual solutions, SAFE-clustering generated the most accurate result with an ARI of 0.995 (Figure 2 and S3A). Moreover, all the three single cells not clustered by Seurat were correctly assigned into their corresponding clusters by SAFE-clustering's borrowing information from the remaining three individual solutions.

For the challenging case PBMC mixture dataset, none of the four individual methods performed well, because CD4+/CD45RA+/CD25- naive T cells are quite similar to CD4+/CD25+ regulatory T cells. SC3 generated the most accurate individual solution, identifying two clusters with an ARI of 0.595 (Figure 2), followed by t-SNE + *k*-means (3 clusters and ARI = 0.405). Similar to the simple case, Seurat failed to generate clustering results for 28 single cells with <200 expressed genes, and resulted in 13 clusters with an ARI of 0.264. SAFE-clustering again outperformed all the four individual methods (Figure 2), correctly identifying three clusters with an ARI = 0.612 (Figure 2 and S3B), correctly clustering 23 out of the 28 single cells which were not clustered by Seurat. These results strongly suggest that SAFE-clustering can provide robust and high quality clustering even under challenging scenarios.

### **Benchmarking of three hypergraph partitioning algorithms in SAFE-clustering**

SAFE-clustering has three hypergraph partitioning algorithms implemented. Among them, CSPA is computationally expensive for datasets with large number of single cells because computational complexity increases quadratically with the number of single cells<sup>36</sup>. To assess the feasibility of the three algorithms on big datasets, we recorded the running time for the simple case of 28,733 cells. As the running time is insensitive to the number of clusters *k*, a 3-way partitioning (that is, *k* was set at 3, the true cluster number) was performed, running each of the algorithms 100 times. As expected, HGPA is ultrafast taking an average of 0.51 +/- 0.02 *second per clustering* (s/c), followed by MCLA, 8.26 +/- 1.54 s/c. CSPA is the slowest with ~576.64 +/- 0.74 s/c (Figure 4A). Finally and importantly, we would like to note that computational costs of these ensemble algorithms are negligible (HGPA and MCLA) or low (CSPA), compared to the computing costs of individual clustering methods (2.5-22 hours per clustering).

Among the three ensemble algorithms, MCLA and CSPA results are deterministic conditional on any specified random number generator (RNG) seed. HGPA, however, generates stochastic results even with a specified RNG seed. To evaluate the stability of HGPA's clustering results, we performed HGPA partitioning 100 times on the simple case dataset and calculated both Average Normalized Mutual Information (ANMI)<sup>24</sup> and ARI for each run. Figure 4B shows that HGPA results, although relatively stable, vary slightly across different runs. Another consequence of HGPA's stochasticity is that different numbers of cluster may be estimated. Therefore, SAFE-clustering by default runs HGPA 10 times, selects the run with the median ANMI value among the 10 runs, and outputs the corresponding consensus result.

To evaluate the performance of the three hypergraph partitioning algorithms, we performed ensemble clustering of the 14 datasets using each of them (namely HGPA, MCLA and CSPA) separately. Comparatively, MCLA is a clear winner: manifesting the highest ANMI in 13 out of the 14 benchmarking datasets (Figure 4C); and exhibiting the highest ARI in 12 out of the 14 datasets (Figure 4D). For the single dataset (Baron\_human3) where MCLA is not the best according to ANMI, its ANMI (0.658) is a close match of the best (0.662 from CSPA). In addition, in this Baron\_human3 dataset, if gauged using ARI, MCLA again outperforms all other methods with ARI = 0.507 and the second best ARI = 0.215 from CSPA. For the two datasets (Goolam and Ting) where MCLA is not the best according to the ARI metric, it is the close match second best with ARI = 0.513 and 0.429 respectively, compared with the best (from CSPA) with ARI = 0.556 and 0.465 respectively. These results suggest that MCLA provides more accurate consensus clustering than the other two algorithms. Therefore, SAFE-clustering uses MCLA as the default partitioning algorithm.

## Improving and running individual ensemble methods

**Individual methods capture different characteristics of scRNA-seq data.** We observe relatively moderate similarity among solutions from individuals ensemble methods (Figure 5), consistent with findings from Freytag et al.<sup>22</sup>. These may reflect different methods capturing different aspects of information from the rather complex and high-dimensional scRNA-seq data, leading to different solutions, but no clear winner.

**Seurat.** Seurat provides a “resolution” parameter to alter the granularity of the clustering results. However, the default “resolution” (= 0.8) tends to result in no clustering for small datasets, as shown in the SC3 paper<sup>21</sup>. To further evaluate the performance of Seurat on small datasets, we generated 100 subsets of samples from the Darmanis dataset, using stratified random sampling without replacement where each cell type was one stratum and single cells from each cell type were randomly selected according to the corresponding cell type proportion. Our sampling strategy resulted in 61 - 239 single cells from the eight cell types, across the 100 generated datasets. The resolution was set to 0.6, 0.9 and 1.2, respectively, following the instruction of Seurat. Due to non-determination from random sampling, the sampling process and the downstream clustering were repeated 100 times for each resolution. The performance of different resolution is quantified by ARI according to published clustering. When sample size ranges from 61 to 150, Seurat clustering with resolution = 1.2 performs significantly better than 0.6 and 0.9 ( $p < 0.05$ , Figure S4A), except for the case between resolution 0.9 and 1.2 in the subset of 120 cells ( $p = 0.124$ ). Comparatively, only one cluster is identified in the subset of 61 cells when resolution = 0.6. When sample size increases to 210, resolution makes no difference.

When applying Seurat to the four small datasets, Biase ( $n = 49$  single cells), Yan ( $n = 90$ ), Goolam ( $n = 124$ ) and Ting ( $n = 187$ ), we used all three resolutions. Overall, Seurat performed better with resolution = 1.2 (Figure S4B), with the exception of Goolam dataset, where clustering with resolution = 0.9 is the best. For Biase dataset, Seurat cannot distinguish different cell types with resolution = 0.6, but ARI reaching to 1 when resolution increases to 1.2.

**tSNE + k-means.** Results from t-SNE +  $k$ -means are stochastic rather than deterministic. To mitigate the fluctuations across runs, we used the ADPclust R-package<sup>37</sup> to first obtain clustering centroids. We compared the performance with and without this ADPclust centroid estimation step before  $k$ -means, on four datasets, Yan, Goolam, Darmanis and Baron\_human2. Expression matrix was log-transformed and dimensionality reduced using t-SNE. For each clustering strategy, t-SNE was carried out 100 times. The number of clusters ranged from 2 to ( $k_t + 2$ ), where  $k_t$  is the true number of clusters. As expected, ARI's from the 100 datasets without ADPclust centroid estimation varied dramatically at most  $k$ 's attempted where  $k$  is the number of clusters fed to  $k$ -means (Figure S5). In contrast, with ADPclust centroid the estimation had much improved stability.

## SC3

For the two PBMC mixture datasets, SC3 estimated 588 and 586 clusters for the simple and challenging case, respectively, dramatically deviating from the truth ( $k = 3$  for both two datasets). A possible reason is that the low sequencing depth coupled with the large number of single cells resulted in weak signals not easily captured by the clustering algorithm (Vladimir Kiselev, personal communication). We therefore performed PCA plot visualization (using *plotPCA* function of *scater* R-package) to narrow down a reasonable range of  $k$ . PCA plot suggested 3 distinct clusters for the simple case and 2 clusters for the challenging case (Figure S6). We therefore decided, for

SC3, on  $k = 3$  for the simple case and  $k = 2$  for the challenging case. SC3 ARI for the simple case at our selected  $k = 3$  is 0.995 and for the challenging case at  $k = 2$  is 0.595.

Because of the issue revealed from the PBMC mixture datasets and because estimation of number of clusters can be separated from clustering *per se*, we ran SC3 for both datasets within a more reasonable range of  $k$ : from 2 to 7. Using the SC3 results from this range, we assessed the robustness of our SAFE-clustering method, holding all the other three individual methods constant. Figure S7 shows that ARI from SC3 fluctuates considerably (0.599 - 0.995 and 0.596 - 0.768 for the simple and challenging case, respectively) when  $k$  increases from 2 to 7. Comparatively, results from our SAFE-clustering are much more stable (ARI ranges from 0.852 to 0.995 for the simple case and from 0.582 to 0.694 for the challenging case, respectively). These results suggest that even with a non-optimal  $k$  selected by one individual method, our SAFE-clustering ensemble method is able to generate robustly accurate results, because our ensemble method borrows information from the other contributing methods. Furthermore, SAFE-clustering correctly estimates the number of clusters (i.e., 3) for both the simple and the challenging case with SC3's  $k$  ranging from 2 to 7.

## Discussion

We present SAFE-clustering, an unsupervised ensemble method to provide fast, accurate and flexible clustering for scRNA-seq data. Generally speaking, the performances of individual clustering methods tend to vary, sometimes rather dramatically, across datasets. Moreover, there is no clear winner among many clustering methods across various datasets. We have benchmarked SAFE-clustering along with four individual clustering methods (SC3, CIDR, Seurat and t-SNE +  $k$ -means) on 14 published scRNA-seq datasets, which is the most comprehensive to date. Among the 14 datasets, SAFE-clustering outperforms all four individual solutions in five benchmarking datasets, and performs better than at least two individual methods in six datasets (Figure 2; Figure S1). For the two PBMC mixture datasets with 28,733 and 32,695 single cells respectively, SAFE-clustering accurately identifies the three cell types of ARI = 0.995 and 0.612 respectively (Figures 2 and S3). Moreover, SAFE-clustering provides the most accurate estimation on the number of cell types compared to the individual methods: SAFE-clustering's average absolute deviation from true cluster numbers (3.357) is much smaller than that any of the four individual methods (average absolute deviation ranging from 4.143 to 6.214) (Figure 3F). These results suggest that SAFE-clustering produces more stable and accurate clustering across various datasets. Finally, SAFE-clustering is computationally efficient, with the additional hypergraph partitioning of individual methods' cluster assignments taking less than 10 seconds to cluster 28,733 cells, using the default MCLA algorithm (Figure 4A). We anticipate that SAFE-clustering will prove valuable for increasingly larger number of investigators working with scRNA-seq data.

## ACKNOWLEDGMENTS

This research is supported by NIH grants R01HG006292 and R01HL129132. MIL is supported by NIH grant P01CA142538-08.

## AUTHOR CONTRIBUTIONS

Y.L. conceived this study; Y.Y. and R.H. constructed the computational framework; Y.Y., R.H. and C.H. performed the benchmarking; Y.Y., R.H., M.I.L. and Y.L. wrote the manuscript, while all other authors provided comments.

## COMPETING FINANCIAL INTERESTS

The authors declare no competing financial interests.

## ONLINE METHODS

### Expression matrix normalization

SAFE-clustering takes an expression matrix as input, where each column represents one single cell and each row corresponds to one gene or transcript. To make the data well-suited for all four individual clustering methods, Fragments/Reads Per Kilobase per Million mapped reads (FPKM/RPKM) data are converted into Transcripts Per Million (TPM); and UMI counts are converted into Counts Per Million mapped reads (CPM). For CIDR, SC3 and t-SNE +  $k$ -means, the input expression matrix is log-transformed after adding ones (to avoid taking log of zeros).

### Clustering using four state-of-the-art methods

**CIDR.** Given the normalized expression matrix, dropout candidates are identified and implicitly imputed to mitigate the impact of lowly expressed genes. Then, dissimilarity matrix (Euclidean distance) is calculated between single cells using the imputed data<sup>16</sup>. As CIDR performs principal coordinate analysis (PCoA) to reduce dimensionality, the number of principal coordinates (PCo's) identified, representing the estimated data dimensionality, heavily influences the final clustering results. Here, the number of PCo's is determined by the internal  $nPC$  function, default choice in CIDR. Alternatively, users can visually decide on an ideal number of PCo's by selecting a threshold at a clear elbow from plotting the proportions of variations explained by the PCo's (also generated by the  $nPC$  function). With the selected PCo's, single cells are hierarchically clustered into  $\hat{k}_{opt-CIDR}$  clusters, with  $\hat{k}_{opt-CIDR}$  estimated using the Calinski-Harabasz Index<sup>38</sup>.

**SC3.** Quality control (QC) metrics are calculated on the input expression matrix to detect potentially problematic genes and/or single cells. Although gene-level filtering is recommended by SC3, for 9 out the 14 benchmarking datasets, all genes would be filtered out and clustering cannot be performed. Therefore, we set the gene filtering option to be "FALSE". In order to speed up computation, we first use the Tracy-Widom method<sup>39,40</sup> to estimate the number of clusters, denoted by  $\hat{k}_{opt-SC3}$ . With the estimated  $\hat{k}_{opt-SC3}$ , matrices of Euclidean, Pearson and Spearman (dis)similarity metrics are calculated among single cells, followed by  $k$ -means clustering. Based on  $k$ -means results across the three different (dis)similarity matrices, a consensus matrix is computed using CSPA, followed by a hierarchical clustering to assign the single cells into  $\hat{k}_{opt-SC3}$  clusters.

For the two PBMC mixture datasets (both with > 5,000 single cells), support vector machines (SVM) is employed to further speed up computation. Specifically, a subset of single cells is randomly selected to form the training dataset where a SVM model with a linear kernel is constructed, using the *svm* function in R-package e1071. The default minimum number of single cells to run SVM is set to be 5,000 (SC3 option *svm\_max* = 5,000). The trained SVM is then used to predict the cluster labels of the remaining single cells.

**Seurat.** Seurat embeds an unsupervised clustering algorithm, combining dimension reduction with graph-based partitioning methods. First, expression matrix is filtered to remove genes expressed in <3 single cells and single cells with <200 expressed genes. Then, the expression data of each single cell is scaled to a total of 10,000 molecules and log-transformed following the procedure described in Macosko et al.<sup>41</sup>. After that, undesired sources of variations are regressed out. Single cells with <200 expressed genes would be considered as "NA" in the final

Seurat clustering results. Data dimensionality is reduced via principal component analysis (PCA) with the principal components (PCs) selected by the *nPC* function in the CIDR package. Graph-based clustering is carried out using the smart local moving algorithm (SLM)<sup>42</sup> with the *resolution* parameter set to be 0.9. For small datasets, Seurat has been reported not to work well<sup>21</sup> and has a tendency to assign all single cells into one cluster when the *resolution* parameter is set to be 0.9. We therefore increase the *resolution* parameter from 0.9 to 1.2 when the number of single cells is less than 200.

***t-SNE + k-means.*** t-SNE followed by *k*-means clustering is a popular method for single cell clustering. Here, we use the Rtsne package with default parameters to reduce normalized expression data into two dimensions. However, when the number of input single cells is small, users may run into the problem that the default *perplexity* of 30 is too big. Since t-SNE has been shown to be fairly robust across *perplexity* values ranging from 5 to 50<sup>18</sup>, we set the *perplexity* to be 10 when the input data contain <200 single cells.

Results from *k*-means clustering can vary dramatically across different runs even with the same input data and same parameters<sup>23</sup> because of random initial cluster centers. To mitigate this potentially highly stochastic behavior, we use the ADPclust R-package<sup>37</sup> to first estimate the centroids. ADPclust can also estimate the number of clusters. Therefore, in our SAFE-clustering implementation, we perform *k*-means clustering using the centroids and number of clusters estimated through ADPclust.

## Hypergraph Partitioning Cluster Ensemble Algorithms

After obtaining clustering results from different individual methods, we perform cluster ensemble to provide a consensus clustering using one of the three hypergraph-based partitioning algorithms: HGPA, MCLA and CSPA, as described in Strehl & Ghosh<sup>23</sup>. Moreover, certain single cell(s) may be excluded from clustering by some individual clustering method(s) due to quality control filter(s) of the corresponding method(s). Ensemble approach can provide a consolidated assignment for these single cells by borrowing information from solutions of the other methods.

### *Hypergraph construction from cluster labels of individual clustering methods*

We start with transforming the output labels of each clustering method into a hypergraph. Briefly, for the  $j^{th}$  clustering method, we use  $v_{ik}$  (note subscript  $j$  is omitted for presentation brevity) to denote the  $i^{th}$  row of the hypergraph  $H_j$ , which is the row vector for the cluster labels (coded as binary dummies or indicator functions) of the  $i^{th}$  single cell, where

$$v_{ik} = \begin{cases} 1, & \text{the } i^{th} \text{ cell} \in \text{the } k_j^{th} \text{ cluster} \\ 0, & \text{the } i^{th} \text{ cell} \notin \text{the } k_j^{th} \text{ cluster} \end{cases}$$

and  $k_j = 1, 2, \dots, K_j$ , with  $K_j$  being the total number of clusters from the  $j^{th}$  clustering method. Here, each column is a hyperedge, representing one particular cluster identified by that method. An overall hypergraph  $H$  is constructed by combining individual hypergraphs (from individual methods).

**HGPA.** HGPA directly partitions hypergraphs by cutting a minimal number of hyperedges. We adopt the approach described in Karypis et al.<sup>43</sup>, where the authors developed a fast and efficient multilevel hypergraph partitioning algorithm through recursive bisection. Specifically, we perform a  $k$ -way hypergraph partitioning using the *shmetis* program in the hMETIS package v. 1.5<sup>43</sup> for a range of  $k$  from 2 to  $\max(K_j)$ ,  $j = 1, 2, 3$ , and 4 for the four different individual clustering methods and  $K_j$  again for the total number of clusters from the  $j^{th}$  method. The parameter *UBfactor* is set at 5, so that in any bisection, each of the two partitions contains 45-55% of the total number of vertices.

**MCLA.** Unlike HGPA, MCLA starts with computing pairwise Jaccard similarities ( $S_j$ ) among all the hyperedges. Specifically, for any two hyperedges  $h_p$  and  $h_q$ :

$$S_j = \frac{h_p h_q^T}{h_p^2 + h_q^2 - h_p h_q^T}$$

where  $p$  and  $q = 1, \dots, h$ , where  $h$  is the total number of hyperedges, which equals to the sum of estimated cluster numbers from individual solutions. With the calculated similarity matrix, all the hyperedges are partitioned into  $k$  meta-clusters using the *gmetis* program in the hypergraph partitioning package METIS v. 5.1.0<sup>44</sup>.

An association index  $AI(MC_{ci})$  is computed to represent the association between meta-cluster  $c$  and the  $i^{th}$  single cell, by averaging the vertices  $v_{ch}$  of the corresponding hyperedges:

$$AI(MC_{ci}) = \frac{1}{H_c} \sum_{h \in H_c} v_{ch}$$

where  $h \in H_c$  is the set of hyperedges assigned in meta-cluster  $c$ . Each single cell is assigned to the meta-cluster with the highest association index. However, some of the  $k$  clusters may be empty due to no single cells having the highest association index with the cluster(s)<sup>23</sup>. Under that scenario, we will re-label the single cells into  $k'$  clusters, where  $k'$  is the number of non-empty clusters.

**CSPA.** CSPA also starts with computing pairwise similarities. In contrast to MCLA, CSPA defines the similarity between two single cells to be 1 if they are *always* assigned to the same cluster, and 0 if they are *never* assigned to the same cluster. The  $n \times n$  (where  $n$  is the number of single cells) similarity matrix  $S$  can be simply constructed by

$$S = \frac{1}{J} H H^T$$

where  $H$  is the overall hypergraph, and  $J$  is the total number of individual clustering methods, here  $J = 4$ . For CSPA, similar to MCLA, we also use the *gmetis* program in the METIS v. 5.1.0 package<sup>44</sup>.

**Performance evaluation using Average Normalized Mutual Information (ANMI).** Since individual methods cluster the single cells into their own optimal number of clusters, we need to estimate an overall optimal cluster number  $\hat{k}_{opt}$  using each of the three ensemble algorithms. For this purpose, we have implemented consensus clustering for a set of  $k_e = (2, 3, \dots, K_e)$ , where  $K_e = \max(K_j)$  and  $j = 1, 2, 3$  and 4 again for the four individual clustering methods, using each of the three algorithms. We evaluate the performance at each  $k_e$  by measuring the shared information between the inferred and true original cluster labels (i.e., mutual information) using the Average Normalized Mutual Information (ANMI) metric, defined in Strehl & Ghosh<sup>23</sup>:

$$ANMI(L_e, L_j) = \frac{\sum_{x=1}^{K_e} \sum_{y=1}^{K_j} \frac{n_{xy}}{n} \log\left(\frac{n_{xy}}{n}\right) - \sum_{x=1}^{K_e} \frac{n_x}{n} \log\left(\frac{n_x}{n}\right) - \sum_{y=1}^{K_j} \frac{n_y}{n} \log\left(\frac{n_y}{n}\right)}{\sqrt{\sum_{x=1}^{K_e} \frac{n_x}{n} \log\left(\frac{n_x}{n}\right) * \sum_{y=1}^{K_j} \frac{n_y}{n} \log\left(\frac{n_y}{n}\right)}}$$

where  $L_e$  and  $L_j$  are the labels from ensemble and from the  $j^{th}$  method with  $K_e$  and  $K_j$  clusters, respectively.  $n$  is the total number of single cells;  $n_y$  denotes the number of single cells assigned to a specific cluster  $y$  ( $y = 1, 2, \dots, K_j$ ) by method  $j$ ; similarly  $n_x$  denotes the number of single cells assigned to cluster  $x$  ( $x = 1, 2, \dots, K_e$ ) via ensemble; and  $n_{xy}$  represents the number of single cells shared between cluster  $y$  (from the solution of the  $j^{th}$  individual method) and cluster  $x$  (from the ensemble solution).



We calculate *ANMI* between each consensus/ensemble solution and each solution from the individual methods. For a particular ensemble solution, the average *ANMI* across individual methods quantifies its similarity to the solutions from individual methods. The ensemble solution with the highest average *ANMI* value (again, average across four individual methods) is selected as the final cluster ensemble  $\hat{L}_{e-opt}$  with the estimated cluster number  $\hat{k}_{e-opt}$ :

$$(\hat{L}_{e-opt}, \hat{k}_{e-opt}) = \arg \max_{L_e, K_e} \frac{\sum_{j=1}^4 n_j * ANMI(L_e, L_j)}{\sum_{j=1}^4 n_j}$$

where  $n_j$  is the total number of single cells clustered by individual method  $j$ ; and  $K_e$  is the number of clusters from an ensemble solution. Note this “average” is more precisely a weighted average rather than a plain average across individual methods unless all methods clustered the same number of single cells (e.g., without removing or failing to cluster any single cell(s),  $n_j = n$  for all  $j$ 's). When users simultaneously employ multiple partitioning algorithms (note our default is one single algorithm), the optimal cluster ensemble is given by:

$$(\hat{L}_{e-opt}, \hat{k}_{e-opt}) = \underset{L_e, K_e, m \in \{HGPA, MCLA \text{ and/or } CSPA\}}{\operatorname{argmax}} ANMI_m$$

### Summary of SAFE-clustering

Run four individual clustering methods and get a  $Y_{4 \times n}$  matrix of cluster labels.  $n$  is the total number of single cells.

Construct hypergraph  $H = \{H_1, H_2, H_3, H_4\}$

**For**  $k=2$  to  $K_{max}$  //  $K_{max}$  is either specified by user or is the maximum across the 4 individual methods

**If** MCLA == TRUE //Default partitioning method

**Do** MCLA

    Compute Jaccard similarity matrix  $S_{JAC}$

$k$ -way partitioning using *gpmetis*

    Compute association index ( $MC_{ci}$ ),  $c = 1, \dots, k$ ;  $i = 1, \dots, n$ , and assign each single cell to the meta-cluster  $c$  with the largest *AI* metric

**If** there are empty clusters

        Re-label into  $k'$  non-empty meta-clusters

**End**

**End**

**If** HGPA == TRUE // If switched to TRUE by the user

**Do** HGPA

$k$ -way partitioning using *shmetis*

**End**

**If** CSPA == TRUE // If switched to TRUE by the user

**Do** CSPA

    Compute and normalized similarity matrix  $S$

$k$ -way partitioning using *gpmetis*

**End**

    Calculate *ANMI* across ensemble algorithm(s) used

**Return** Consensus cluster labels  $\hat{L}_e$  and *ANMI*

**End**

**Return** Optimal consensus result  $\hat{L}_{e-opt}$  of  $\hat{k}_{e-opt}$  clusters with the highest *ANMI* (across attempted  $k$ 's)

**Benchmarking datasets.** For performance evaluation, we carried out clustering analysis on 14 benchmark scRNA-seq datasets (Table 1), using our SAFE-clustering and the four individual clustering methods. All these datasets have pre-defined gold/silver-standard (we call “true”) cell type information. We used default parameters for 12 out of the 14 datasets, with the two exceptions being the 2 PBMC mixture datasets (each with >28,000 single cells). For SC3, gene-level filtering option was turned on only in five out of the 14 datasets (Yan, Goolam, Biase, Deng and Ting), because the remaining 7 datasets would each have zero genes surviving its quality filtering. For SC3 and t-SNE +  $k$ -means, all reported results are from random seed 123.

Performance is measured by the similarity between the estimated cluster labels ( $L_E$ ) and the true cluster labels ( $L_T$ ) using the Adjusted Rand Index (ARI)<sup>35</sup>:

$$ARI(L_E, L_T) = \frac{\sum_{e,t} \binom{n_{et}}{2} - \left[ \sum_e \binom{n_e}{2} \sum_t \binom{n_t}{2} \right] / \binom{n}{2}}{\frac{1}{2} \left[ \sum_e \binom{n_e}{2} + \sum_t \binom{n_t}{2} \right] - \left[ \sum_e \binom{n_e}{2} \sum_t \binom{n_t}{2} \right] / \binom{n}{2}}$$

where  $n$  is the total number of single cells;  $n_e$  and  $n_t$  are the number of single cells in estimated cluster  $e$  and in true cluster  $t$ , respectively; and  $n_{et}$  is the number of single cells shared by estimated cluster  $e$  and true cluster  $t$ .

Computing time reported in this work is all from running on an iMac with 3.4 GHz Intel Core i5, 32 GB 1600 MHz DDR3 of RAM and OS X 10.9.5 operating system.

## Software availability

The source code for SAFE-clustering is available under <http://yunliweb.its.unc.edu/safe/>, and the package “SAFE” is currently under development.

## Reference

1. Arsenio, J. *et al.* Early specification of CD8+ T lymphocyte fates during adaptive immunity revealed by single-cell gene-expression analyses. *Nat. Immunol.* **15**, 365–372 (2014).

2. Trapnell, C. *et al.* The dynamics and regulators of cell fate decisions are revealed by pseudotemporal ordering of single cells. *Nat. Biotechnol.* **32**, 381–386 (2014).
3. Treutlein, B. *et al.* Reconstructing lineage hierarchies of the distal lung epithelium using single-cell RNA-seq. *Nature* **509**, 371–375 (2014).
4. Darmanis, S. *et al.* A survey of human brain transcriptome diversity at the single cell level. *Proc. Natl. Acad. Sci.* **112**, 7285–7290 (2015).
5. Tang, F. *et al.* Tracing the derivation of embryonic stem cells from the inner cell mass by single-cell RNA-Seq analysis. *Cell Stem Cell* **6**, 468–478 (2010).
6. Buganim, Y. *et al.* Single-cell expression analyses during cellular reprogramming reveal an early stochastic and a late hierarchic phase. *Cell* **150**, 1209–1222 (2012).
7. Shalek, A. K. *et al.* Single-cell transcriptomics reveals bimodality in expression and splicing in immune cells. *Nature* **498**, 236–240 (2013).
8. Guo, G. *et al.* Resolution of cell fate decisions revealed by single-cell gene expression analysis from zygote to blastocyst. *Dev. Cell* **18**, 675–685 (2010).
9. Kalisky, T. & Quake, S. R. Single-cell genomics. *Nat. Methods* **8**, 311–314 (2011).
10. Jaitin, D. A. *et al.* Massively parallel single-cell RNA-seq for marker-free decomposition of tissues into cell types. *Science (80-. )*. **343**, 776–779 (2014).
11. Mahata, B. *et al.* Single-cell RNA sequencing reveals T helper cells synthesizing steroids de novo to contribute to immune homeostasis. *Cell Rep.* **7**, 1130–1142 (2014).
12. Grün, D. *et al.* Single-cell messenger RNA sequencing reveals rare intestinal cell types. *Nature* **525**, 251–255 (2015).
13. Rozenblatt-Rosen, O., Stubbington, M. J. T., Regev, A. & Teichmann, S. A. The Human Cell Atlas: from vision to reality. *Nature* (2017).
14. Sun, Z. *et al.* DIMM-SC: A Dirichlet mixture model for clustering droplet-based single cell transcriptomic data. *Bioinformatics* **btx490**, (2017).
15. Xu, C. & Su, Z. Identification of cell types from single-cell transcriptomes using a novel clustering method. *Bioinformatics* **31**, 1974–1980 (2015).
16. Lin, P., Troup, M. & Ho, J. W. K. CIDR: Ultrafast and accurate clustering through imputation for single-cell RNA-seq data. *Genome Biol.* **18**, 59 (2017).
17. Wang, B., Zhu, J., Pierson, E., Ramazzotti, D. & Batzoglou, S. Visualization and analysis of single-cell RNA-seq data by kernel-based similarity learning. *Nat. Methods* **14**, 414–416 (2017).
18. Van der Maaten, L. & Hinton, G. Visualizing data using t-sne. *J. Mach. Learn. Res.* **9**, 2579–2605 (2008).
19. Shin, J. *et al.* Single-cell RNA-seq with waterfall reveals molecular cascades underlying adult neurogenesis. *Cell Stem Cell* **17**, 360–372 (2015).
20. Satija, R., Farrell, J. A., Gennert, D., Schier, A. F. & Regev, A. Spatial reconstruction of single-cell gene expression data. *Nat. Biotechnol.* **33**, 495–502 (2015).
21. Kiselev, V. Y. *et al.* SC3: consensus clustering of single-cell RNA-seq data. *Nat. Methods* **14**, 483–486 (2017).

22. Freytag, S., Lonnstedt, I., Ng, M. & Bahlo, M. Cluster Headache: Comparing Clustering Tools for 10X Single Cell Sequencing Data. *bioRxiv* 203752 (2017).
23. Strehl, A. & Ghosh, J. Cluster ensembles---a knowledge reuse framework for combining multiple partitions. *J. Mach. Learn. Res.* **3**, 583–617 (2002).
24. Ghosh, J. & Acharya, A. Cluster ensembles. *Wiley Interdiscip. Rev. Data Min. Knowl. Discov.* **1**, 305–315 (2011).
25. Kuepfer, L., Peter, M., Sauer, U. & Stelling, J. Ensemble modeling for analysis of cell signaling dynamics. *Nat. Biotechnol.* **25**, 1001–1006 (2007).
26. Hubner, I. A., Deeds, E. J. & Shakhnovich, E. I. High-resolution protein folding with a transferable potential. *Proc. Natl. Acad. Sci. U. S. A.* **102**, 18914–18919 (2005).
27. Baron, M. *et al.* A single-cell transcriptomic map of the human and mouse pancreas reveals inter-and intra-cell population structure. *Cell Syst.* **3**, 346–360 (2016).
28. Biase, F. H., Cao, X. & Zhong, S. Cell fate inclination within 2-cell and 4-cell mouse embryos revealed by single-cell RNA sequencing. *Genome Res.* **24**, 1787–1796 (2014).
29. Deng, Q., Ramsköld, D., Reinius, B. & Sandberg, R. Single-cell RNA-seq reveals dynamic, random monoallelic gene expression in mammalian cells. *Science (80-. ).* **343**, 193–196 (2014).
30. Goolam, M. *et al.* Heterogeneity in Oct4 and Sox2 targets biases cell fate in 4-cell mouse embryos. *Cell* **165**, 61–74 (2016).
31. Ting, D. T. *et al.* Single-cell RNA sequencing identifies extracellular matrix gene expression by pancreatic circulating tumor cells. *Cell Rep.* **8**, 1905–1918 (2014).
32. Yan, L. *et al.* Single-cell RNA-Seq profiling of human preimplantation embryos and embryonic stem cells. *Nat. Struct. Mol. Biol.* **20**, 1131–1139 (2013).
33. Zeisel, A. *et al.* Cell types in the mouse cortex and hippocampus revealed by single-cell RNA-seq. *Science (80-. ).* **347**, 1138–1142 (2015).
34. Zheng, G. X. Y. *et al.* Massively parallel digital transcriptional profiling of single cells. *Nat. Commun.* **8**, 14049 (2017).
35. Hubert, L. & Arabie, P. Comparing partitions. *J. Classif.* **2**, 193–218 (1985).
36. Punera, K. & Ghosh, J. Consensus-based ensembles of soft clusterings. *Appl. Artif. Intell.* **22**, 780–810 (2008).
37. Wang, X.-F. & Xu, Y. Fast clustering using adaptive density peak detection. *Stat. Methods Med. Res.* 962280215609948 (2015).
38. Caliński, T. & Harabasz, J. A dendrite method for cluster analysis. *Commun. Stat. Methods* **3**, 1–27 (1974).
39. Tracy, C. A. & Widom, H. Level-spacing distributions and the Airy kernel. *Commun. Math. Phys.* **159**, 151–174 (1994).
40. Patterson, N., Price, A. L. & Reich, D. Population structure and eigenanalysis. *PLoS Genet.* **2**, e190 (2006).
41. Macosko, E. Z. *et al.* Highly parallel genome-wide expression profiling of individual cells using nanoliter droplets. *Cell* **161**, 1202–1214 (2015).

42. Waltman, L. & van Eck, N. J. A smart local moving algorithm for large-scale modularity-based community detection. *Eur. Phys. J. B* **86**, 471 (2013).
43. Karypis, G., Aggarwal, R., Kumar, V. & Shekhar, S. Multilevel hypergraph partitioning: applications in VLSI domain. *IEEE Trans. Very Large Scale Integr. Syst.* **7**, 69–79 (1999).
44. Karypis, G. & Kumar, V. A fast and high quality multilevel scheme for partitioning irregular graphs. *SIAM J. Sci. Comput.* **20**, 359–392 (1998).

**Table 1. Major characteristics of the 14 benchmarking datasets.** Table 1 lists several major characteristics of the 14 benchmarking datasets, including organism origin, number of single cells, the numbers of true and estimated clusters by SAFE-clustering and four individual methods, as well as references.

|                                  | organism | #single cells | #true clusters | #estimated clusters |      |        |                         |                 | Ref |
|----------------------------------|----------|---------------|----------------|---------------------|------|--------|-------------------------|-----------------|-----|
|                                  |          |               |                | SC3                 | CIDR | Seurat | t-SNE + <i>k</i> -means | SAFE-clustering |     |
| Baron_human1                     | Human    | 1,937         | 14             | 23                  | 3    | 12     | 9                       | 13              | 27  |
| Baron_human2                     | Human    | 1,724         | 14             | 23                  | 9    | 10     | 6                       | 6               | 27  |
| Baron_human3                     | Human    | 3,605         | 14             | 37                  | 5    | 12     | 10                      | 20              | 27  |
| Baron_human4                     | Human    | 1,303         | 14             | 19                  | 3    | 9      | 3                       | 4               | 27  |
| Baron_mouse1                     | Mouse    | 822           | 13             | 18                  | 13   | 9      | 4                       | 8               | 27  |
| Biase                            | Mouse    | 49            | 3              | 3                   | 5    | 3      | 3                       | 4               | 28  |
| Darmanis                         | Human    | 420           | 8              | 11                  | 7    | 5      | 4                       | 7               | 4   |
| Deng                             | Mouse    | 286           | 9              | 9                   | 8    | 5      | 3                       | 7               | 29  |
| Goolam                           | Mouse    | 124           | 5              | 6                   | 7    | 3      | 3                       | 7               | 30  |
| Ting                             | Mouse    | 187           | 7              | 13                  | 10   | 5      | 10                      | 10              | 31  |
| Yan                              | Human    | 90            | 7              | 5                   | 5    | 3      | 3                       | 4               | 32  |
| Zeisel                           | Mouse    | 3,005         | 9              | 32                  | 5    | 13     | 4                       | 14              | 33  |
| simple case<br>PBMC mixture      | Human    | 28,733        | 3              | 3                   | 3    | 17     | 3                       | 3               | 34  |
| challenging case<br>PBMC mixture | Human    | 32,695        | 3              | 2                   | 10   | 13     | 3                       | 3               | 34  |

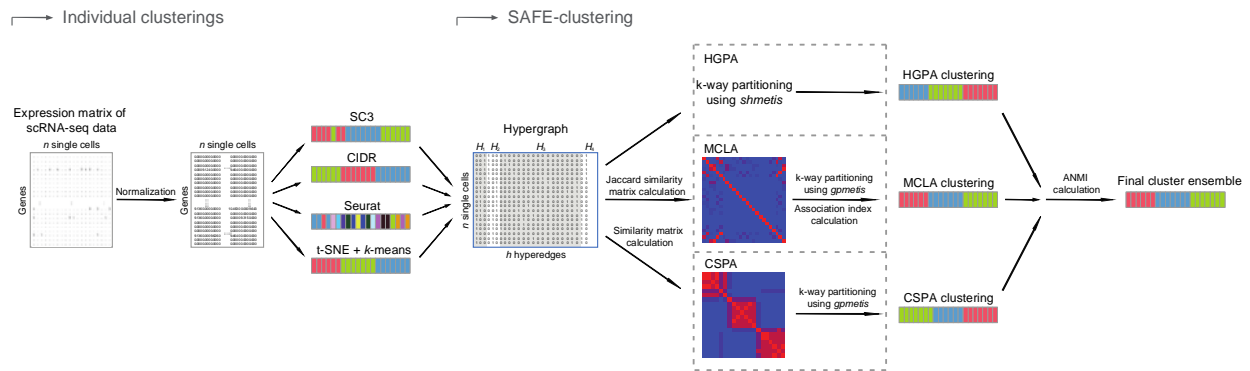

**Figure 1. Overview of SAFE-clustering.** Log-transformed expression matrix of scRNA-seq data are first clustered using four state-of-the-art methods, SC3, CIDR, Seurat and t-SNE +  $k$ -means; and then individual solutions are combined using one of the three hypergraph-based partitioning algorithms: hypergraph partitioning algorithm (HGPA), meta-cluster algorithm (MCLA) and cluster-based similarity partitioning algorithm (CSPA) to produce consensus clustering.

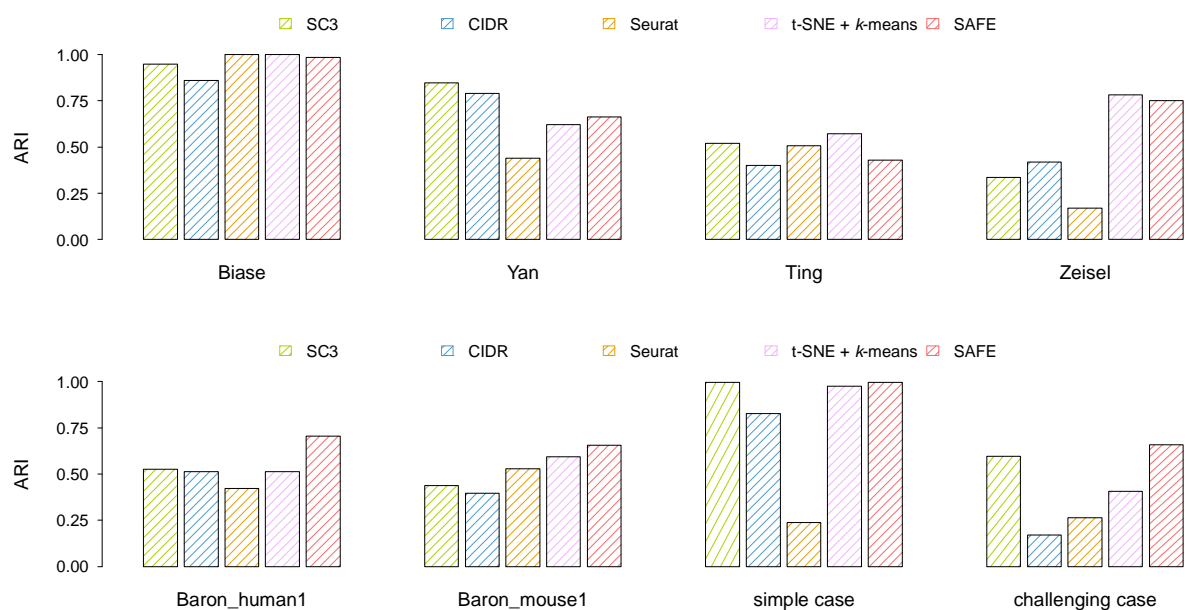

**Figure 2. Benchmarking of SAFE-clustering in eight published datasets.** Adjusted Rand Index (ARI) is employed to measure the similarity between inferred and true cluster labels. Detailed information of the eight datasets (Biase, Yan, Ting, Zeisel, Baron\_human1, Baron\_mouse1, and two PBMC mixture datasets) can be found in Table 1 and supplementary Table S1.



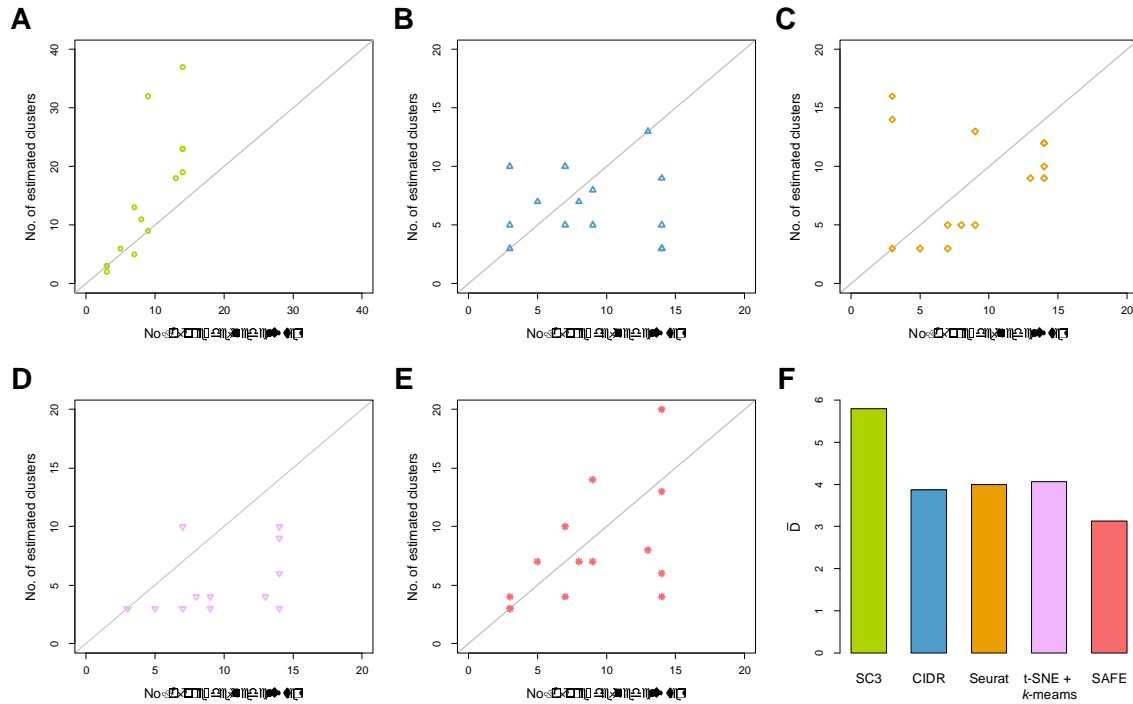

**Figure 3. Accuracy evaluation of the inferred number of cluster.** A-E. Correlations between inferred cluster numbers from SC3, CIDR, Seurat, t-SNE +  $k$ -means and SAFE-clustering, respectively, and the true cluster numbers, across the 14 benchmarking datasets. F. Average deviations between the inferred and the true numbers of clusters, measured by  $\bar{D} = \frac{1}{m} \sum_m |\hat{k} - k_t|$ , where the number of datasets  $m$  equals to 14.

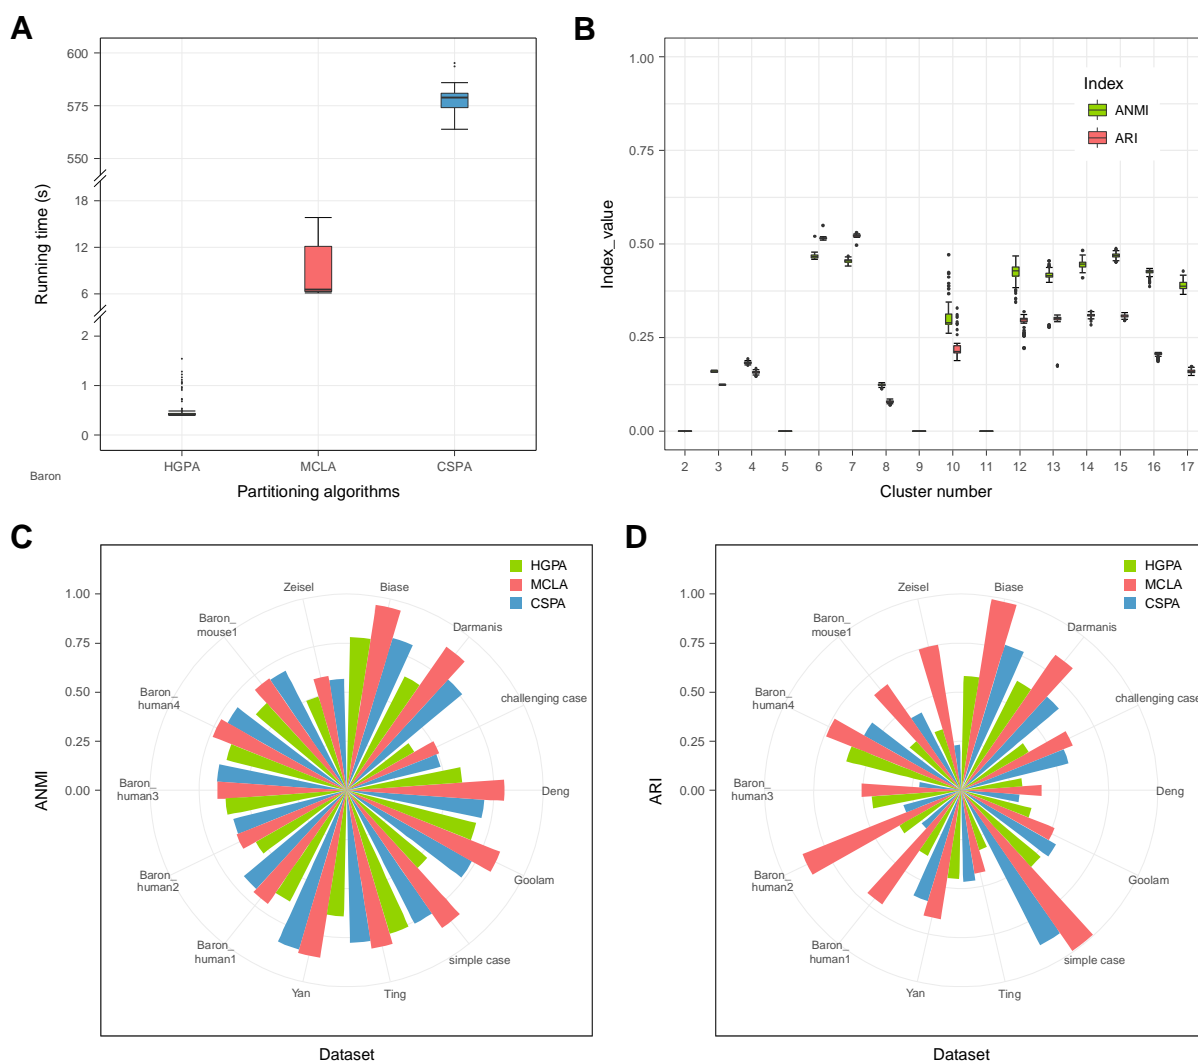

**Figure 4. Benchmark of the three hypergraph partitioning algorithms: HGPA, MCLA and CSPA. A.** Running time for 3-way partitioning of simple case PBMC mixture dataset with 28,733 single cells using each of the three partitioning algorithms. Each algorithm was applied 100 times. **B.** Stability of HGPA from 100 runs using simple case PBMC mixture dataset with 28,733 single cells. **C.** Similarity between consensus clustering and individual solutions in 14 benchmarking datasets, measured by Average Normalized Mutual Information (ANMI). **D.** Performance of the three partitioning algorithms, measured by ARI, across the 14 benchmarking datasets.

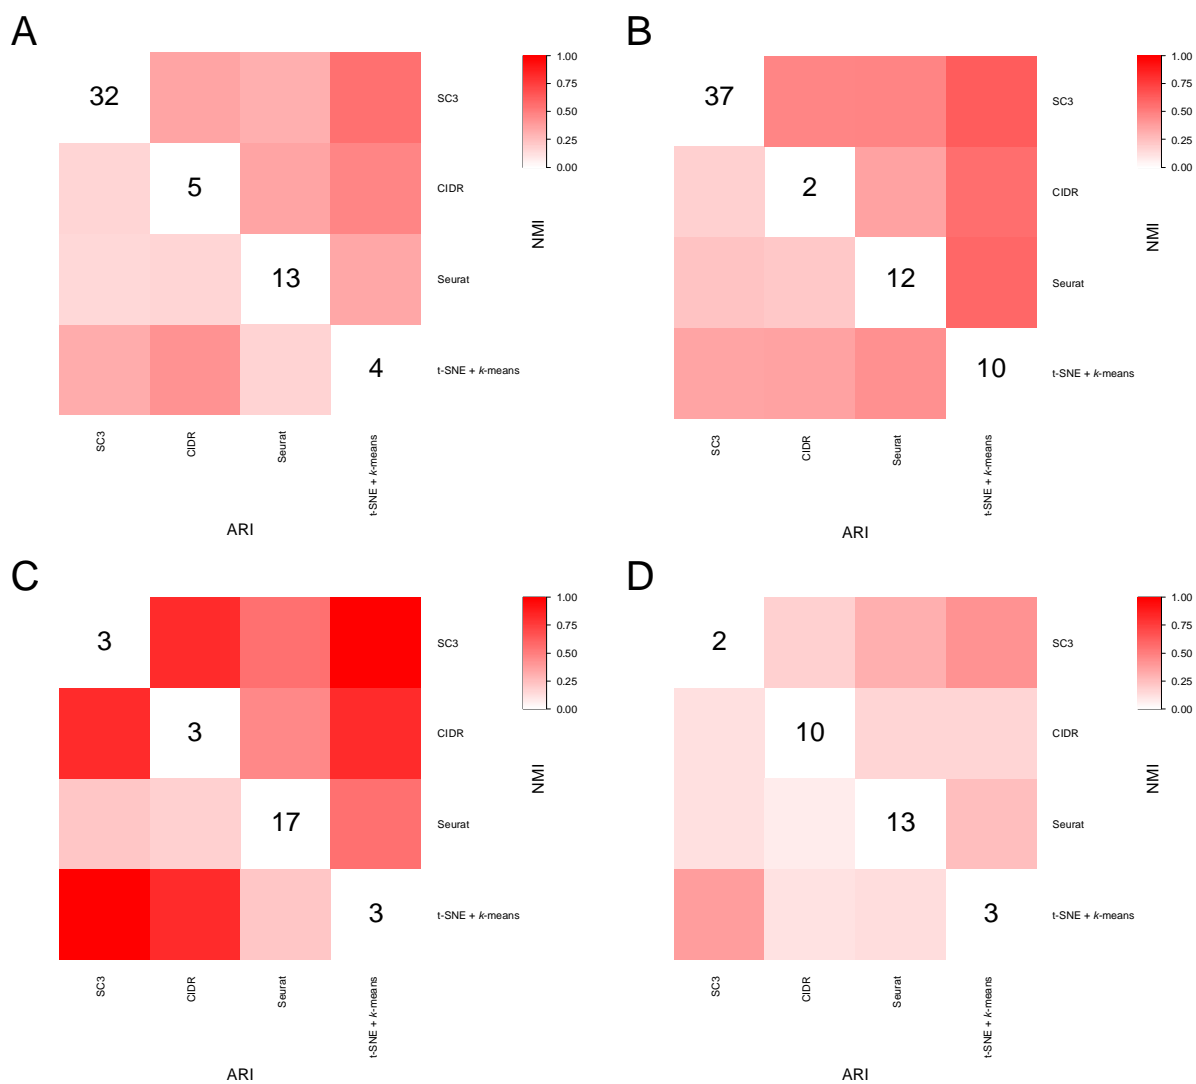

**Figure 5. Similarity of solutions from individual clustering methods. A.** Zeisel dataset; **B.** Baron\_human3 dataset; **C.** simple case PBMC mixture dataset; **D.** challenging case PBMC mixture dataset.
